# Supplementary material
Source: publisher site journal article supplement (https://www.degruyterbrill.com/publication/isbn/9783110498516/downloadAsset/9783110498516_Look_Inside.pdf)
Supplement: Supplementary file 1 [file 9783110498516_Look_Inside.pdf]

## Einleitung

STEFAN SONVILLA-WEISS

Die vorliegende Publikation widmet sich zwei komplexen Themenbereichen, die im Rahmen der Convention *VIS-A-VIS Medien.Kunst.Bildung*<sup>1</sup> im Vordergrund standen: „Lebenswirklichkeiten von Jugendlichen“ und „School of Tomorrow“. Zum besseren Verständnis sei erwähnt, dass sowohl der theoretische als auch der praktische Bezugsrahmen sich der Gründungsidee des Ars Electronica Festivals verpflichtet fühlt, nämlich „nach der Zukunft zu fragen und diese Recherche an der Schnittstelle von Kunst, Technologie und Gesellschaft anzusiedeln.“<sup>2a</sup>

Neben Kunst, Technologie, Gesellschaft ist der informelle Bildungsauftrag eine wesentliche Aufgabe – nicht zuletzt dadurch begründet, dass neben Individualbesucher\*innen hauptsächlich Schulklassen die Hauptzielgruppen des AECs sind.

Die vorliegende Publikation versteht sich daher als Versuch, den gegenwärtigen Medienbildungsdiskurs – zumindest in einigen Aspekten – vor dem Hintergrund der bald 30-jährigen Geschichte des Prix Ars Electronica Festivals, des 18-jährigen Bestehens der U19 – CREATE YOUR WORLD Kinder- und Jugendkategorie, den permanenten und temporären Ausstellungen des AEC, aufzuspannen.

Um die Programmatik der Convention besser verstehen zu können, lohnt es sich, den organisatorischen und konzeptionellen „initial starting point“ ein wenig näher zu betrachten. Mit der Vergabe des UNESCO city of media arts-Titels 2004 an Linz rücken mit dieser Auszeichnung verstärkt die historisch gewachsenen Strukturen unterschiedlicher Kultur- und Bildungseinrichtungen mit spezifischen Medienschwerpunkten in den Vordergrund.

Den medienbildungsspezifischen Schwerpunkt bildet im Kanon des intermediären Fokus (Interface Culture, Zeitbasierte und interaktive Medien, Medientheorie, -kultur) der Kunstuniversität Linz das Lehrstuhlstudium Mediengestaltung, welches 2009 ins Leben gerufen wurde.

Bereits in den 1990er Jahren gab es viele Projekte und Initiativen im Spannungsfeld Schule-Kultureinrichtungen-Vermittler\*innen-Künstler\*innen – digitale Medien (Beispiel Museum Online), die auf

<sup>1</sup> [www.visa-vis2016.at](http://www.visa-vis2016.at)

<sup>2</sup> [www.aec.at/festival/](http://www.aec.at/festival/)

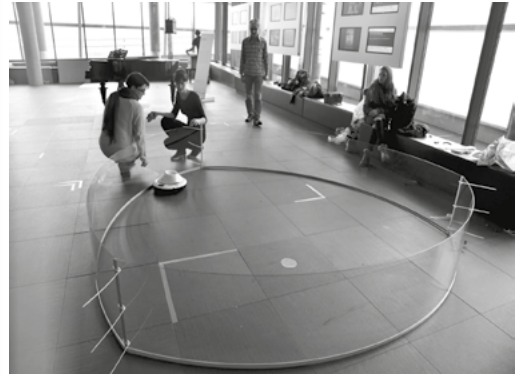

einer großflächigen IKT-Offensive des damaligen Bundesministeriums für Unterricht, Kunst und Kultur (BMUKK) basierten. In diesem Zusammenhang stellt sich notwendigerweise die Frage, warum die kreativ-gestalterischen Aspekte im Umgang mit Informations- und Kommunikationstechnologien über einen langen Zeitraum im Medien-Bildungsraum wenig bis gar keine Beachtung fanden.

Eine der vielen möglichen Erklärungen für diese retardierende Entwicklung war der Kampf um Deutungshoheit, Kontrolle und Ermächtigung über computergenerierte Information. In sekundären Bildungseinrichtungen wurde diese Entwicklung vor allem durch lokale Serverarchitekturen, veraltete Soft- und Hardware befördert. (vgl. Sonvilla-Weiss 2003, 21 ff.) Damit einher ging eine Konzentration von Insider-Wissen in den Händen und Köpfen einiger weniger, die dazu führte, dass die Hemmschwelle der Nutzer\*innen im Verständnis und Umgang mit dem Computer – zunächst als Text- und Speichermedium – größer wurde. Erst Ende der 1990er Jahre wurde mit der Etablierung von multimedialeichen Computern im Fach Bildne-

VIS-A-VIS Ausstellungsbau; Im Bild Walter Stadler's Nihilator, 2016

## 4 Fotos für die Sinne: Überlegungen zu einer grundlegenden Veränderung im Markt der fotografischen Bilder

LEOPOLD KISLINGER

### Einleitung

Im Winter und Frühling 2016 tauchten auf Plakaten Fotos auf, die aus der Masse der Werbefotos hervorsprangen. Sie waren Teil von Kampagnen der Coca-Cola-Company und der Hornbach Gruppe.

Im Jänner 2016 hatte die Coca-Cola Company ihre neue globale Werbekampagne mit dem Titel „Taste the Feeling.“ (Moye 2016) vorgestellt. Es ging in ihr um „the experience of drinking an ice-cold Coca-Cola“ (Moye 2016). Im betreffenden Kontext ist „experience“ am besten mit „Erlebnis“ zu übersetzen. (Schmitt 1999: 60)

Die Kampagne wurde von einem internationalen Netzwerk von Agenturen entwickelt und umfasst TV-Spots, Fotos, Material für digitale Kanäle und Druck sowie Musik (Moye 2016).

Die Hornbach Gruppe, die Bau- und Gartenmärkte betreibt, präsentierte im Frühling 2016 die europaweite Kampagne mit dem Titel „Du lebst. Erinnerst Du Dich?“ („Heimat, Berlin“ 2016). Sie wurde von der Agentur „Heimat Berlin“ produziert und sollte „eine haptische Erlebnisreise“ vermitteln: „Material trifft auf Haut. Leben auf Lebewesen [...], emotional, unverfälscht und ein bisschen schmerzhaft. Um die Menschen zu erinnern: Du lebst.“ („Heimat, Berlin“ 2016)

Der vorliegende Beitrag bezieht sich ausschließlich auf die Fotos bzw. Plakate der beiden Kampagnen, nicht jedoch auf die Videos oder Texte. Ein besonderes gemeinsames Merkmal der Fotos der beiden Kampagnen besteht darin, dass in ihnen durchgehend Wahrnehmungen des Tast- und Hautsinns, des Stimmungs-, Bewegungs- und Kraftsinns sowie des Wärme- und Kältesinns zur Darstellung gebracht worden sind. Alle diese Sinne gehören zur Modalität des so genannten somatosensorischen Wahrnehmens, das zusätzlich noch die Wahrnehmung von Schmerz und von mechanischen und chemischen Signalen aus dem Körperinneren vermittelt. Es soll hier nachgezeichnet werden, auf welche besondere Weise mit der Herstellung der Coca-Cola- und

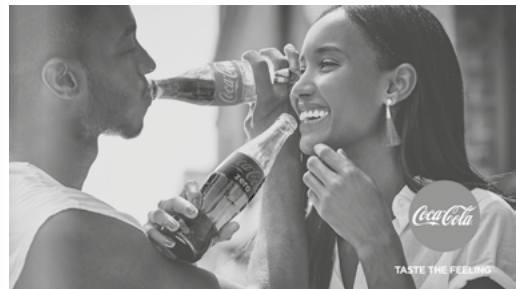

Hornbach-Fotos ein neuer beschriftet worden ist. Es wird gefragt, ob und wie der Anblick fotografischer Abbildungen, in denen die Information nur in visuellen Reizen vorliegt, überhaupt multisensorische Verarbeitungsprozesse auslösen kann. Und es wird von verschiedenen Ereignissen berichtet, die auf einen grundlegenden Umbruch im Markt der fotografischen Bilder (Paries 2015) schließen lassen.

Letztlich geht es um grundlegende Möglichkeiten, durch die Herstellung und Verwendung von Bildern spezifische Aufgaben zu lösen, das heißt um einen Inhalt, der sich auf verschiedene medienpädagogische Handlungsfelder beziehen lässt.

### „Taste the Feeling“

Die Fotos der Coca-Cola-Kampagne stammen von den Modelfotografen Guy Aroch und Nacho Ricci und zeigen „authentic, unscripted moments in a contemporary way.“ (Moye 2016)

Die Coca-Cola-Company zeigte auf ihrer Website 17 Beispiele der über 100 Farbfotos, die für die Kampagne ausgewählt wurden ([http://www.coca-colacompany.com/immersive-galleries/\\_taste-the-feeling-out-of-home-ads/](http://www.coca-colacompany.com/immersive-galleries/_taste-the-feeling-out-of-home-ads/)). Auf allen diesen Fotos sind Menschen abgebildet, auf vielen Fotos nur eine Person, auf manchen zwei, selten mehr. Die Bildausschnitte sind eng gesetzt, so dass von der zentralen Person nur

„Taste the feeling out of home“ - Coca Cola

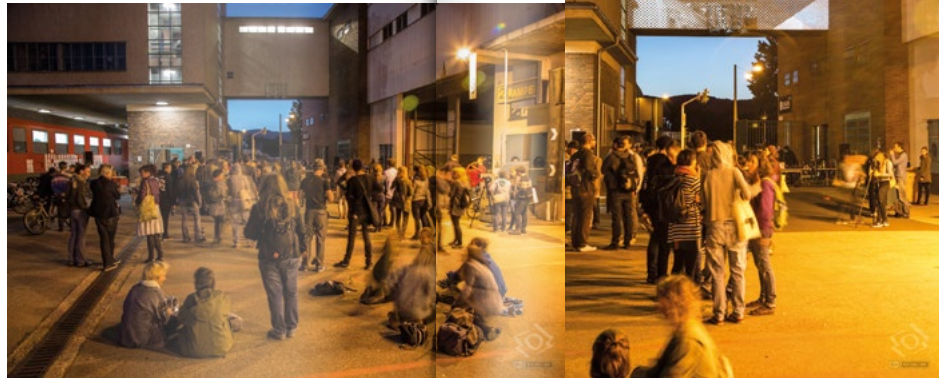

### Metamorphose

Visuals: Christina Peichler & Julia Steiner  
 Audio: Lukas Kirschbichler & Raphaela Danner  
 Live Performance, 2015  
 Fotos © Michael Waschitz

Auf Entdeckungsreise durch die alten Gemäuer.  
 Etwas hören, etwas sehen.  
 Einfangen – Verarbeiten – Wiedergeben. REMIX.

*Metamorphose* ist eine audiovisuelle Liveperformance aus Bildern und Geräuschen, die ausschließlich in der Tabakfabrik Linz aufgenommen wurden.  
<https://vimeo.com/juliasteiner>

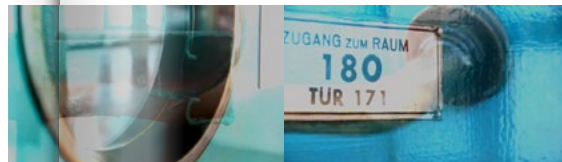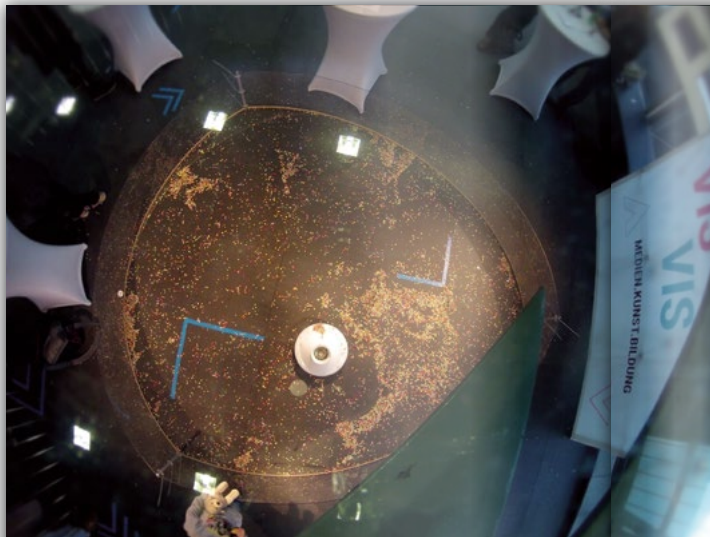

### Der Nihilator

Walter Stadler, Installation, 2015

Der Nihilator ist ein Witz auf ein zentrales Element sinn- und ordnungstiftender Mechanismen. Er nihilisiert den tödlichen Ernst einer Terrororganisation ebenso, wie er ein Witz über Märkte, Bildungssysteme, Beziehungen, Gesellschaftsklassen, Familien und jedes nur denkbare selbstbezügliche System ist. Der Nihilator, der sich als Kunstwerk um Aufmerksamkeit und Publikum bewirbt, ist auch ein Witz über Kunst.

*Sinn ist ein Mechanismus zur Reduktion von Komplexität.* - Niklas Luhmann

Der Nihilator ist ein umgebauter Staubsaugerroboter, bei dem die aufgesaugten Partikel sogleich wieder nach oben ausgeblasen werden. Beim Staubsaugerroboter wurde die Staubkammer entfernt. Der hinter dem Staubfilter der Staubkammer sitzende Propeller wurde

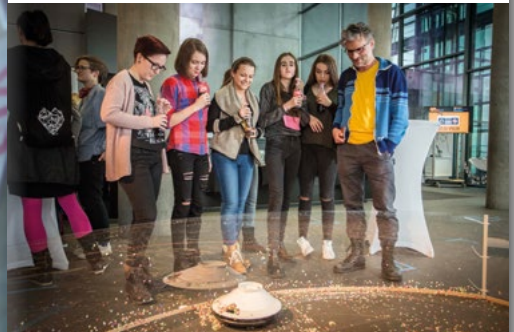

Installationsansicht *Der Nihilator*, AEG-Center im Rahmen der Convention VIS-A-VIS, 2016

ausgebaut und oberhalb der Staubkammer montiert, sodass die Luft nicht nach hinten, sondern nach oben angesaugt wird. Da der Original-Rotor die Aufgabe hatte, an der relativ kleinen Fläche des Staubfilters einen starken Sogdruck aufzubauen, war er ungeeignet, den Luftstrom in eine relativ breite Röhre nach oben zu leiten. Der Rotor wurde also von der Achse entfernt und ein breiterer, der aus einem Ventilator ausgebaut wurde, aufgesetzt. Mit einer Blechschere wurden die Rotorblätter so zurechtgestutzt, dass sie in die Röhre, die auf den durch das Entfernen des Staubbehälters entstandenen Raum aufgesetzt wurde, passten. Die Röhre ist ein abgeschnittenes Abwasserrohr, die Übergänge wurden mit Klebeband abgedichtet. An der Logik und Sensorik wurde nichts verändert.
